# Supplementary material
Source: publisher figshare collection journal article supplement (https://frontiersin.figshare.com/ndownloader/files/12092237)
Supplement: Supplementary file 1 [file 12092237]

Supplement

Table 1 Fatty acid content of the green alga *Chlamydomonas klinobasis* grown in continuous cultures at 15°C, 20°C and 25°C. Fatty acid concentrations are given as amount per biomass (determined as particulate organic carbon, POC). The values are means of independent extractions, SE is given in brackets. Only detected fatty acids are given.

|  | Mean concentration of fatty acid [µg/mg POC] (SE) | | |
| --- | --- | --- | --- |
| Fatty acid | Grown at 15°C | Grown at 20°C | Grown at 25°C |
| C 14:0 | 4.19 (0.06) | 4.70 (0.52) | 4.37 (0.01) |
| C 14:1 n-9 | 2.09 (0.07) | 2.38 (0.19) | 2.07 (0.03) |
| C 16:0 | 18.22 (0.12) | 19.75 (0.26) | 17.77 (0.09) |
| C 16:1 n-9 | 1.87 (0.38) | 2.58 (0.68) | 2.22 (0.69) |
| C 16:4 | 9.49 (0.15) | 11.96 (0.19) | 8.93 (0.08) |
| C 18:0 | 1.07 (0.08) | 1.08 (0.01) | 0.77 (0.00) |
| C 18:1 n-9 c | 12.41 (0.10) | 11.67 (0.23) | 10.00 (0.08) |
| C 18:1 n-7 | 2.33 (0.02) | 6.07 (0.10) | 5.18 (0.02) |
| C 18:2 n-6 c | 1.32 (0.01) | 3.55 (0.08) | 3.53 (0.03) |
| C 18:3 n-3 | 63.90 (0.98) | 71.52 (2.03) | 56.96 (1.33) |
